# Supplementary material for: Water splitting at imine-linked covalent organic frameworks
Source: Royal Society of Chemistry journal article supplement (doi:10.1039/d4cp02019g), 2024-01-01
Supplement: d4cp02019g1.pdf [file d4cp02019g1.pdf]

## Supplementary Information

### Water splitting at imine-linked covalent organic frameworks

Felizitas Gottwald<sup>1</sup>, Christopher Penschke<sup>1</sup>, and Peter Saalfrank<sup>1,2</sup>

<sup>1</sup> Universität Potsdam, Institut für Chemie,  
Karl-Liebknecht-Str. 24-25, D-14476 Potsdam-Golm, Germany,  
<sup>2</sup> Universität Potsdam, Institut für Physik und Astronomie,  
Karl-Liebknecht-Str. 24-25, D-14476 Potsdam-Golm, Germany

July 5, 2024

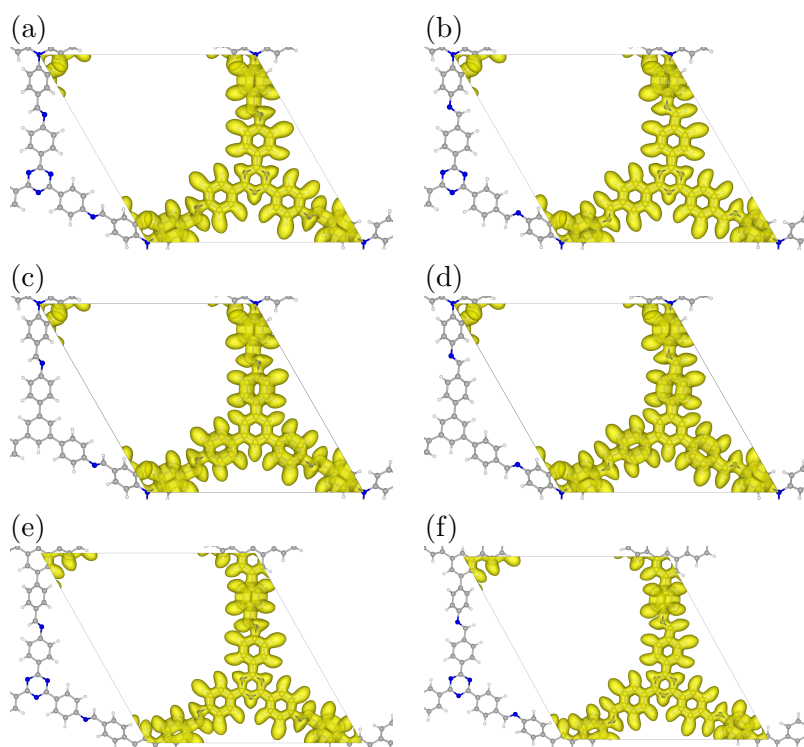

Figure 1: Electron localization function (ELF) with an isosurface value of 0.5 of (a) DCNA-1, (b) DNCA-1, (c) DCNA-2, (d) DNCA-2, (e) DCNA-3, (f) DNCA-3.

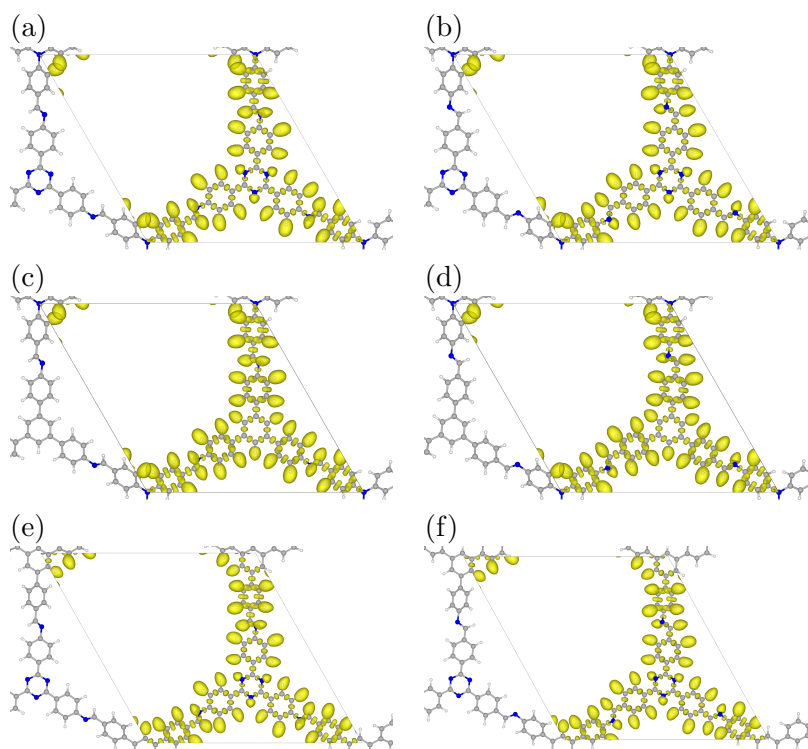

Figure 2: Electron localization function (ELF) with an isosurface value of 0.8 of (a) DCNA-1, (b) DNCA-1, (c) DCNA-2, (d) DNCA-2, (e) DCNA-3, (f) DNCA-3.

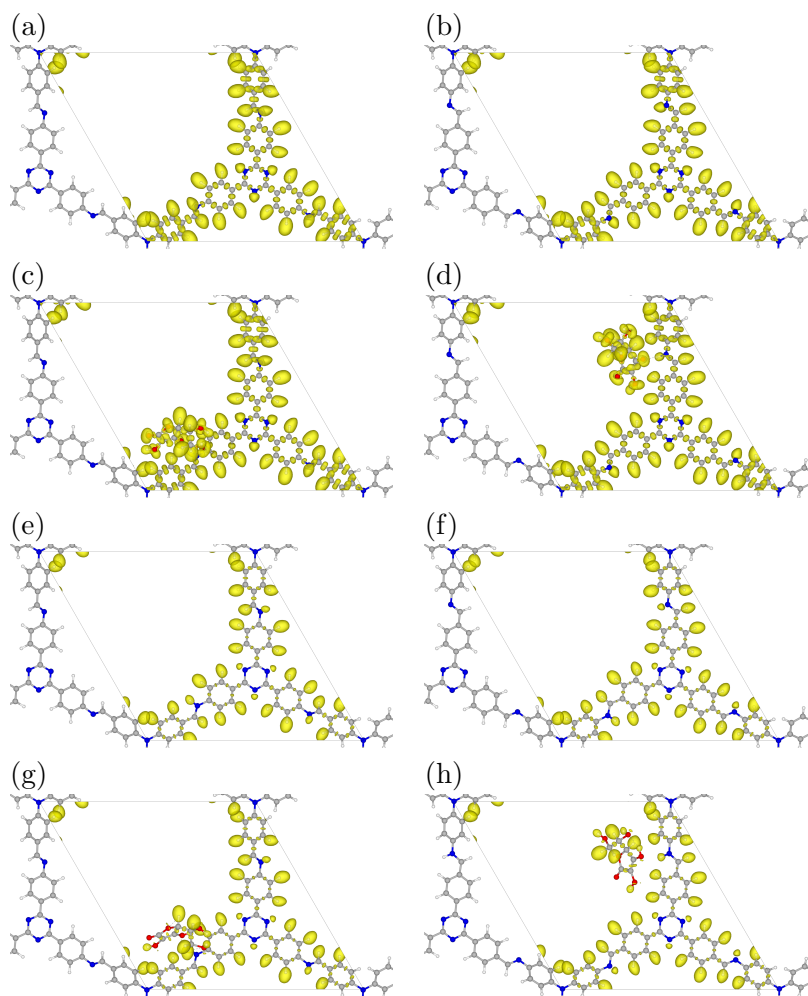

Figure 3: Electron localization function (ELF) with an isosurface value of 0.8 of (a) DCNA-1, (b) DNCA-1, (c) DCNA-1\_AC, (d) DNCA-1\_AC, (e) DCNA-1-H, (f) DNCA-1-H, (g) DCNA-1\_AC-H, (h) DNCA-1\_AC-H.
